# Supplementary material
Source: HighWire-hosted journal article supplement (https://jnm.snmjournals.org/highwire/filestream/94518/field_highwire_adjunct_files/0/123547_Supplemental_Data.pdf)
Supplement: 123547_Supplemental_Data.pdf [file 123547_Supplemental_Data.pdf]

**SUPPLEMENTAL TABLE 1.** Clinical data of participants who underwent PET/CT followed by PET/MRI

| Pt. no. | Tracer type          | Age (yr)/ Gender | Primary diagnoses                    | Change in management based on |         | Added value of PET/MRI                             |
|---------|----------------------|------------------|--------------------------------------|-------------------------------|---------|----------------------------------------------------|
|         |                      |                  |                                      | PET/CT                        | PET/MRI |                                                    |
| 1       | <sup>18</sup> F-FDG  | 37 M             | Osteosarcoma, left jaw               | No                            | No      | Nil                                                |
| 2       | <sup>18</sup> F-FDG  | 49 M             | Unknown primary                      | Yes                           | Yes     | Yes                                                |
| 3       | <sup>18</sup> F-FDG  | 54 M             | Lymphoma                             | No                            | No      | Nil                                                |
| 4       | <sup>18</sup> F-FDG  | 70 M             | Lung cancer                          | No                            | No      | Nil                                                |
| 5       | <sup>18</sup> F-FDG  | 76 F             | Cervical cancer                      | Yes                           | Yes     | Upstaged disease from T3A to T4                    |
| 6       | <sup>18</sup> F-FDG  | 58 F             | Ovarian cancer                       | No                            | No      | Nil                                                |
| 7       | <sup>18</sup> F-FDG  | 61 F             | Lung cancer                          | Yes                           | No      | Nil                                                |
| 8       | <sup>18</sup> F-FDG  | 14 F             | Cervical cancer                      | Yes                           | Yes     | Nil                                                |
| 9       | <sup>18</sup> F-FDG  | 75 M             | Non-Hodgkin's lymphoma               | No                            | No      | Nil                                                |
| 10      | <sup>18</sup> F-FDG  | 74 F             | Vaginal melanoma                     | Yes                           | Yes     | Synchronous rectal lesion and presacral lymph node |
| 11      | <sup>18</sup> F-FDG  | 75 F             | Squamous cell cancer, base of tongue | No                            | No      | Nil                                                |
| 12      | <sup>18</sup> F-FDG  | 67 M             | Thyroid cancer                       | Yes                           | Yes     | Down staged disease from T4 to T3                  |
| 13      | <sup>18</sup> F-FDG  | 45 M             | Esophageal cancer                    | No                            | No      | Nil                                                |
| 14      | <sup>18</sup> F-FDG  | 21 M             | Peritoneal sarcoma                   | No                            | No      | Nil                                                |
| 15      | <sup>18</sup> F-FDG  | 76 F             | Unknown primary                      | No                            | No      | Nil                                                |
| 16      | <sup>18</sup> F-FDG  | 73 M             | Gastric lymphoma                     | No                            | No      | Nil                                                |
| 17      | <sup>18</sup> F-FDG  | 29 M             | Bone lymphoma                        | No                            | No      | Nil                                                |
| 18      | <sup>18</sup> F-FDG  | 67 M             | Colorectal cancer                    | No                            | No      | Nil                                                |
| 19      | <sup>18</sup> F-FDG  | 73 M             | Lung cancer                          | No                            | No      | Nil                                                |
| 20      | <sup>18</sup> F-FDG  | 50 M             | Lymphoma                             | No                            | No      | Nil                                                |
| 21      | <sup>18</sup> F-FDG  | 50 F             | Breast cancer                        | No                            | No      | Nil                                                |
| 22      | <sup>18</sup> F-FDG  | 51 F             | Cervical cancer                      | Yes                           | Yes     | Nil                                                |
| 23      | <sup>18</sup> F-FDG  | 56 F             | Uterine cancer                       | No                            | No      | Nil                                                |
| 24      | <sup>18</sup> F-FDG  | 22 M             | Lymphoma                             | No                            | No      | Nil                                                |
| 25      | <sup>18</sup> F-FDG  | 56 M             | Esophageal cancer                    | No                            | No      | Nil                                                |
| 26      | <sup>18</sup> F-FDG  | 49 F             | Leiomyosarcoma                       | No                            | No      | Nil                                                |
| 27      | <sup>18</sup> F-FDG  | 36 M             | Seminoma                             | No                            | No      | Nil                                                |
| 28      | <sup>18</sup> F-FDG  | 47 M             | Rectal cancer                        | No                            | No      | Nil                                                |
| 29      | <sup>18</sup> F-FDG  | 18 M             | Rectal cancer                        | No                            | No      | Nil                                                |
| 30      | <sup>18</sup> F-FDG  | 70 M             | Lung cancer                          | No                            | No      | Nil                                                |
| 31      | <sup>18</sup> F-FDG  | 56 M             | Nasopharyngeal cancer                | Yes                           | Yes     | Down staged disease from T3 to T2                  |
| 32      | <sup>18</sup> F-FDG  | 57 M             | Tongue cancer                        | No                            | No      | Nil                                                |
| 33      | <sup>18</sup> F-FDG  | 32 F             | Hodgkin's lymphoma                   | No                            | No      | Nil                                                |
| 34      | <sup>18</sup> F-FDG  | 26 M             | Lymphoma                             | No                            | No      | Nil                                                |
| 35      | <sup>18</sup> F-FECH | 11 F             | Astrocytoma                          | No                            | No      | Nil                                                |
| 36      | <sup>18</sup> F-FECH | 67 M             | Prostate cancer                      | Yes                           | Yes     | Nil                                                |
| 37      | <sup>18</sup> F-FECH | 71 M             | Prostate cancer                      | No                            | No      | Nil                                                |
| 38      | <sup>18</sup> F-FECH | 66 M             | Hepatocellular carcinoma             | No                            | No      | Nil                                                |
| 39      | <sup>18</sup> F-FECH | 75 M             | Prostate cancer                      | No                            | No      | Nil                                                |
| 40      | <sup>18</sup> F-FECH | 18 M             | Pineal germ cell tumor               | No                            | No      | Nil                                                |
| 41      | <sup>18</sup> F-FECH | 68 M             | Prostate cancer                      | No                            | No      | Nil                                                |

|    |                           |      |                         |     |     |                                   |
|----|---------------------------|------|-------------------------|-----|-----|-----------------------------------|
| 42 | <sup>18</sup> F-FECH      | 15 M | Glioblastoma multiforme | No  | No  | Nil                               |
| 43 | <sup>18</sup> F-FECH      | 17 M | Glioblastoma multiforme | No  | No  | Nil                               |
| 44 | <sup>18</sup> F-FECH      | 14 M | Astrocytoma             | No  | No  | Nil                               |
| 45 | <sup>18</sup> F-FECH      | 72 M | Prostate cancer         | Yes | Yes | Nil                               |
| 46 | <sup>18</sup> F-FECH      | 69 M | Prostate cancer         | No  | No  | Nil                               |
| 47 | <sup>68</sup> Ga-DOTATATE | 68 F | Neuroendocrine tumor    | No  | No  | Nil                               |
| 48 | <sup>68</sup> Ga-DOTATATE | 46 M | Neuroendocrine tumor    | No  | No  | Nil                               |
| 49 | <sup>68</sup> Ga-DOTATATE | 17 F | Paraganglioma           | Yes | Yes | Two additional lesions identified |
| 50 | <sup>68</sup> Ga-DOTATATE | 43 M | Pituitary tumor         | No  | No  | Nil                               |

Abbreviations: <sup>18</sup>F-FDG = <sup>18</sup>F-Fluorodeoxyglucose, <sup>68</sup>Ga-DOTATATE = <sup>68</sup>Ga-DOTA-

DPhe<sup>1</sup>Tyr<sup>3</sup>-octreotate, <sup>18</sup>F-FECH = <sup>18</sup>F-fluoro-ethyl-choline

Time interval between PET/CT and PET/MRI (h)\*\*= Calculated from the start of PET/CT acquisition to the start of PET/MRI acquisition
